# Supplementary material for: Metabolome × Microbiome Changes Associated with a Diet-Induced Reduction in Hepatic Fat among Adolescent Boys
Source: MDPI journal article supplement (doi:10.3390/metabo13030401), 2023-03-08
Supplement: s1 [file s1]

### **Supplementary Materials:**

“Metabolome x microbiome changes associated with a diet-induced reduction in hepatic fat among adolescent boys”

### **By:**

Catherine C. Cohen<sup>1\*</sup>, Helaina Huneault<sup>2</sup>, Carolyn J. Accardi<sup>3</sup>, Dean P. Jones<sup>3</sup>, Ken Liu<sup>3</sup>, Kristal M. Maner-Smith<sup>4</sup>, Ming Song<sup>5,6</sup>, Jean A. Welsh<sup>2,7,8</sup>, Patricia A Ugalde-Nicola<sup>9,10</sup>, Jeffrey B. Schwimmer<sup>9,10</sup> and Miriam B. Vos<sup>2,7,8</sup>

### **Author Affiliations:**

<sup>1</sup> Department of Pediatrics, School of Medicine, University of Colorado Anschutz Medical Campus, Aurora, CO USA

<sup>2</sup> Nutrition & Health Sciences Doctoral Program, Laney Graduate School, Emory University, Atlanta, GA USA

<sup>3</sup> Department of Medicine, School of Medicine, Emory University, Atlanta, GA USA

<sup>4</sup> Emory Integrated Lipidomics Core, School of Medicine, Emory University, Atlanta, GA USA

<sup>5</sup> Department of Medicine, University of Louisville School of Medicine, Louisville, KY USA

<sup>6</sup> Hepatobiology and Toxicology Center, University of Louisville School of Medicine, Louisville, KY USA

<sup>7</sup> Department of Pediatrics, School of Medicine, Emory University, Atlanta, GA USA

<sup>8</sup> Children's Healthcare of Atlanta, Atlanta, GA USA

<sup>9</sup> Department of Gastroenterology, Rady Children's Hospital San Diego, San Diego, CA USA

<sup>10</sup> Department of Pediatrics, School of Medicine, University of California, San Diego, CA USA

\*Correspondence to: [Catherine.Cohen@cuanschutz.edu](mailto:Catherine.Cohen@cuanschutz.edu)

**Table S1:** Baseline characteristics of the sub-sample of participants (n=19) who provided stool samples for 16S rRNA metagenomics sequencing

| Variable                           | Usual Diet Group (n=10) |              | Diet Treatment Group (n=9) |             | p-value |
|------------------------------------|-------------------------|--------------|----------------------------|-------------|---------|
|                                    | Mean/Median             | SD/IQR       | Mean/Median                | SD/IQR      |         |
| Age (years)                        | 13.3                    | 1.83         | 12.44                      | 1.59        | 0.294   |
| Hepatic Fat (%) <sup>a</sup>       | 19                      | 13.1, 25.4   | 27.3                       | 22.0, 27.7  | 0.165   |
| Waist circumference (cm)           | 109.7                   | 15.4         | 95.18                      | 37.8        | 0.279   |
| Hip circumference (cm)             | 110.23                  | 13.07        | 93.96                      | 37.55       | 0.214   |
| BMI Z-score <sup>a</sup>           | 2.43                    | 2.10, 2.62   | 2.37                       | 2.28, 2.47  | 0.935   |
| ALT (U/L) <sup>a</sup>             | 92                      | 66.0, 119.3  | 104                        | 72.0, 150.0 | 0.513   |
| AST (U/L) <sup>a</sup>             | 40                      | 28.0, 53.3   | 51                         | 32.0, 61.0  | 0.540   |
| GGT (U/L) <sup>a</sup>             | 51.5                    | 29.8, 75.5   | 58                         | 23.0, 63.0  | 0.806   |
| Glucose (mg/dL)                    | 95.9                    | 12.15        | 97.33                      | 8.03        | 0.768   |
| Insulin (mg/dL) <sup>a</sup>       | 34.4                    | 31.0, 55.9   | 31.4                       | 23.5, 57.8  | 0.513   |
| HOMA-IRa                           | 7.8                     | 7.1, 11.5    | 7.9                        | 5.7, 13.6   | 0.624   |
| Total Cholesterol (mg/dL)          | 149.6                   | 31.01        | 168.67                     | 43.57       | 0.283   |
| LDL Cholesterol (mg/dL)            | 98                      | 24.15        | 113.44                     | 36.48       | 0.287   |
| HDL Cholesterol (mg/dL)            | 38                      | 5.33         | 39.11                      | 8.07        | 0.725   |
| Triglycerides (mg/dL) <sup>a</sup> | 155.5                   | 120.3, 178.8 | 107                        | 83.0, 234.0 | 0.653   |

<sup>a</sup> Estimates presented as Medians and IQRs due to skewed distribution

**Table S2:** Mean change values and 95% confidence intervals by treatment group for all confirmed (Level 1 MSI) or putatively annotated (Level 2 MSI) m/z features from both the HILIC/+ESI column and the C18/-ESI column

| A) HILIC / +ESI Column |          |                                           |         |           |                                      |                                        |                      |                      |
|------------------------|----------|-------------------------------------------|---------|-----------|--------------------------------------|----------------------------------------|----------------------|----------------------|
| m/z                    | Time (s) | Compound Name                             | Adduct  | MSI Level | Control Group Mean $\Delta$ (95% CI) | Treatment Group Mean $\Delta$ (95% CI) | p-value <sup>a</sup> | q-value <sup>b</sup> |
| 88.0393                | 103.1    | 2-Aminoacrylic acid                       | M+H     | 2         | -0.12 (-0.25, 0.02)                  | 0.14 (0.01, 0.28)                      | 0.0090               | 0.6323               |
| 99.044                 | 287.8    | 2-Furanmethanol                           | M+H     | 2         | 0.28 (-0.13, 0.7)                    | -0.38 (-0.79, 0.04)                    | 0.0317               | 0.7318               |
| 104.0706               | 82.3     | 2-Aminobutyric acid                       | M+H     | 1         | 0 (-0.15, 0.15)                      | 0.28 (0.13, 0.44)                      | 0.0122               | 0.6836               |
| 105.0547               | 25.9     | 3-Hydroxybutyric acid                     | M+H     | 2         | 0.09 (-0.01, 0.18)                   | 0.22 (0.12, 0.31)                      | 0.0490               | 0.7419               |
| 106.0499               | 98.3     | Serine                                    | M+H     | 1         | -0.03 (-0.11, 0.05)                  | 0.11 (0.02, 0.19)                      | 0.0245               | 0.7318               |
| 106.0863               | 228.4    | Diethanolamine                            | M+H     | 2         | -0.35 (-0.71, 0.01)                  | 0.18 (-0.18, 0.53)                     | 0.0481               | 0.7391               |
| 107.0855               | 272.3    | m-Xylene                                  | M+H     | 2         | -0.51 (-1, -0.02)                    | 0.27 (-0.23, 0.76)                     | 0.0303               | 0.7318               |
| 108.0808               | 117.6    | 3-Ethylpyridine                           | M+H     | 2         | -0.25 (-0.48, -0.01)                 | 0.19 (-0.05, 0.43)                     | 0.0137               | 0.6948               |
| 113.0961               | 30       | 4-Heptenal                                | M+H     | 2         | -0.13 (-0.39, 0.13)                  | 0.25 (-0.01, 0.5)                      | 0.0411               | 0.7347               |
| 115.039                | 291.6    | Norfuraneol                               | M+H     | 2         | 0.49 (0.19, 0.78)                    | -0.18 (-0.48, 0.11)                    | 0.0035               | 0.6072               |
| 118.0498               | 25.4     | Acetylglycine                             | M+H     | 1         | -0.15 (-0.38, 0.09)                  | 0.21 (-0.03, 0.44)                     | 0.0393               | 0.7347               |
| 119.0855               | 242.6    | Indane                                    | M+H     | 2         | -0.28 (-0.55, -0.01)                 | 0.16 (-0.1, 0.43)                      | 0.0236               | 0.7318               |
| 120.0032               | 86.3     | Glycine                                   | M+2Na-H | 1         | -0.15 (-0.24, -0.07)                 | 0.03 (-0.06, 0.11)                     | 0.0043               | 0.6072               |
| 121.0648               | 22.3     | 4-Hydroxystyrene                          | M+H     | 2         | -0.01 (-0.13, 0.12)                  | 0.26 (0.13, 0.39)                      | 0.0068               | 0.6284               |
| 123.0652               | 213.7    | Erythritol                                | M+H     | 2         | -0.19 (-0.49, 0.11)                  | 0.24 (-0.06, 0.54)                     | 0.0464               | 0.7390               |
| 123.1168               | 246.4    | Santene                                   | M+H     | 2         | -0.45 (-0.66, -0.25)                 | 0.19 (-0.01, 0.4)                      | 0.0001               | 0.3286               |
| 126.022                | 87.6     | Taurine                                   | M+H     | 1         | 0.28 (0.1, 0.46)                     | -0.08 (-0.26, 0.1)                     | 0.0059               | 0.6072               |
| 127.0727               | 201      | Melamine                                  | M+H     | 2         | 0.1 (-0.21, 0.4)                     | -0.35 (-0.65, -0.04)                   | 0.0459               | 0.7390               |
| 129.1274               | 26.8     | Octanal                                   | M+H     | 2         | -0.08 (-0.2, 0.04)                   | 0.13 (0.01, 0.25)                      | 0.0167               | 0.7283               |
| 135.0441               | 19.7     | Phthalide                                 | M+H     | 2         | -0.07 (-0.4, 0.26)                   | 0.51 (0.18, 0.84)                      | 0.0172               | 0.7283               |
| 135.1168               | 255      | p-Cymene                                  | M+H     | 2         | -0.64 (-1.05, -0.24)                 | 0.03 (-0.38, 0.44)                     | 0.0236               | 0.7318               |
| 139.0754               | 210.4    | Tyrosol                                   | M+H     | 2         | 0.03 (-0.23, 0.28)                   | 0.41 (0.16, 0.66)                      | 0.0362               | 0.7347               |
| 140.107                | 20       | 9-Azabicyclo331nonan-3-one                | M+H     | 2         | 0.55 (0.04, 1.06)                    | -0.21 (-0.72, 0.3)                     | 0.0398               | 0.7347               |
| 147.0764               | 97.8     | Glutamine                                 | M+H     | 1         | 0.05 (-0.02, 0.12)                   | -0.06 (-0.13, 0.01)                    | 0.0304               | 0.7318               |
| 148.0039               | 82.4     | Taurine                                   | M+Na    | 1         | 0.31 (0.11, 0.52)                    | -0.13 (-0.33, 0.07)                    | 0.0041               | 0.6072               |
| 149.0598               | 212.2    | Cinnamic acid                             | M+H     | 2         | -0.09 (-0.38, 0.21)                  | 0.39 (0.1, 0.69)                       | 0.0275               | 0.7318               |
| 150.0914               | 16       | Venoterpine                               | M+H     | 2         | 0.17 (-0.01, 0.34)                   | 0.53 (0.35, 0.7)                       | 0.0058               | 0.6072               |
| 151.1118               | 208.7    | Thymol                                    | M+H     | 2         | -0.02 (-0.26, 0.22)                  | 0.35 (0.11, 0.59)                      | 0.0322               | 0.7318               |
| 153.1023               | 25.9     | 2-Methoxy-(3 or 5 or 6)-isopropylpyrazine | M+H     | 2         | 0.33 (-0.16, 0.82)                   | -0.6 (-1.09, -0.11)                    | 0.0107               | 0.6527               |
| 154.0587               | 84.6     | Creatine                                  | M+Na    | 1         | -0.07 (-0.27, 0.13)                  | 0.22 (0.03, 0.42)                      | 0.0405               | 0.7347               |
| 166.0723               | 63.7     | 7-Methylguanine                           | M+H     | 2         | 0.32 (0.12, 0.51)                    | -0.09 (-0.28, 0.11)                    | 0.0057               | 0.6072               |
| 166.0856               | 72.7     | Phenylalanine                             | M+H     | 1         | 0.16 (0.07, 0.24)                    | 0.01 (-0.08, 0.1)                      | 0.0206               | 0.7283               |
| 166.1227               | 225.5    | Pseudoephedrine                           | M+H     | 2         | -0.61 (-1.27, 0.05)                  | 0.52 (-0.14, 1.18)                     | 0.0220               | 0.7318               |
| 169.9858               | 83.1     | Taurine                                   | M+2Na-H | 1         | 0.31 (0.1, 0.52)                     | -0.12 (-0.33, 0.09)                    | 0.0060               | 0.6072               |
| 170.1176               | 243.7    | Homoarecoline                             | M+H     | 2         | -0.32 (-0.65, 0)                     | 0.16 (-0.16, 0.49)                     | 0.0376               | 0.7347               |
| 171.0056               | 140      | Glyceraldehyde 3-phosphate                | M+H     | 2         | -0.05 (-0.12, 0.02)                  | 0.05 (-0.02, 0.12)                     | 0.0486               | 0.7410               |
| 173.1173               | 216.8    | Tetrahydrofurfuryl butyrate               | M+H     | 2         | 0.67 (0.39, 0.95)                    | 0.26 (-0.02, 0.54)                     | 0.0409               | 0.7347               |
| 177.0546               | 23.5     | Herniarin                                 | M+H     | 2         | 0.08 (0.02, 0.13)                    | 0.2 (0.14, 0.26)                       | 0.0045               | 0.6072               |

|          |       |                                                       |                      |   |                      |                      |        |        |
|----------|-------|-------------------------------------------------------|----------------------|---|----------------------|----------------------|--------|--------|
| 177.0546 | 243   | Herniarin                                             | M+H                  | 2 | -0.23 (-0.44, -0.02) | 0.09 (-0.12, 0.29)   | 0.0349 | 0.7347 |
| 181.1223 | 285.8 | Tetramethyl-16-dioxaspiro[9.9]nona-3,8-diene          | M+H                  | 2 | -0.41 (-0.8, -0.03)  | 0.29 (-0.1, 0.68)    | 0.0134 | 0.6948 |
| 184.9856 | 227.6 | Phosphohydroxypyruvic acid                            | M+H                  | 2 | 0.33 (0.06, 0.59)    | -0.09 (-0.36, 0.17)  | 0.0292 | 0.7318 |
| 185.1169 | 282.1 | Nepetalic acid                                        | M+H                  | 2 | -0.53 (-0.99, -0.06) | 0.22 (-0.25, 0.69)   | 0.0288 | 0.7318 |
| 188.1281 | 119.1 | N-Heptanoylglycine                                    | M+H                  | 2 | -0.01 (-0.25, 0.23)  | 0.39 (0.15, 0.63)    | 0.0227 | 0.7318 |
| 191.1026 | 102.3 | Diaminopimelic acid                                   | M+H                  | 2 | -0.39 (-0.72, -0.07) | 0.22 (-0.1, 0.54)    | 0.0096 | 0.6323 |
| 194.0805 | 15.6  | Phenylacetylglycine                                   | M+H                  | 2 | -0.37 (-0.98, 0.24)  | 0.59 (-0.02, 1.21)   | 0.0299 | 0.7318 |
| 198.1125 | 18.8  | Metanephrene                                          | M+H                  | 2 | -0.08 (-0.25, 0.08)  | 0.18 (0.02, 0.35)    | 0.0260 | 0.7318 |
| 199.039  | 289.1 | 3-Dechloroethylfosfamide                              | M+H                  | 2 | 0.09 (-0.16, 0.35)   | -0.31 (-0.57, -0.06) | 0.0288 | 0.7318 |
| 203.1027 | 87.8  | Alanyl-Hydroxyproline                                 | M+H                  | 2 | -0.3 (-0.58, -0.02)  | 0.13 (-0.15, 0.41)   | 0.0323 | 0.7318 |
| 207.1743 | 267.7 | delta-Methylionone                                    | M+H                  | 2 | -0.61 (-1.18, -0.04) | 0.24 (-0.33, 0.8)    | 0.0413 | 0.7347 |
| 209.0127 | 105.8 | (Methylsulfinyl)-1-propenyl 2-propenyl disulfide      | M+H                  | 2 | 0.4 (0.1, 0.71)      | -0.21 (-0.52, 0.09)  | 0.0058 | 0.6072 |
| 209.092  | 66.5  | Kynurenine                                            | M+H                  | 1 | 0.01 (-0.09, 0.12)   | -0.14 (-0.24, -0.03) | 0.0442 | 0.7390 |
| 211.144  | 47.6  | Cyclo(leucyl-prolyl)                                  | M+H                  | 2 | 0.23 (-0.26, 0.72)   | -0.47 (-0.96, 0.02)  | 0.0498 | 0.7419 |
| 212.1182 | 28.1  | Varenicline                                           | M+H                  | 2 | 0.2 (-1.18, 1.58)    | -1.9 (-3.28, -0.52)  | 0.0372 | 0.7347 |
| 212.2009 | 13.4  | Ethyl menthane carboxamide                            | M+H                  | 2 | -0.41 (-0.69, -0.14) | -0.01 (-0.29, 0.26)  | 0.0461 | 0.7390 |
| 213.9823 | 145.1 | Chloroxine                                            | M+H                  | 2 | 0.23 (-0.17, 0.63)   | -0.34 (-0.74, 0.05)  | 0.0455 | 0.7390 |
| 215.0702 | 26.4  | Phenyl salicylate                                     | M+H                  | 2 | -0.05 (-0.12, 0.02)  | 0.06 (-0.01, 0.13)   | 0.0251 | 0.7318 |
| 215.1277 | 252.3 | 5-Hexyltetrahydro-2-oxo-3-furancarboxylic acid        | M+H                  | 2 | 0.21 (-0.11, 0.53)   | -0.36 (-0.68, -0.04) | 0.0143 | 0.7012 |
| 217.1188 | 96.9  | Prolyl-Threonine                                      | M+H                  | 2 | -0.62 (-1.37, 0.14)  | 0.72 (-0.04, 1.47)   | 0.0159 | 0.7275 |
| 217.1797 | 27    | 12-Hydroxydodecanoic acid                             | M+H                  | 2 | 0.14 (0.04, 0.23)    | 0.29 (0.2, 0.39)     | 0.0257 | 0.7318 |
| 221.1535 | 43.4  | 26-Di-tert-butylbenzoquinone                          | M+H                  | 2 | -0.25 (-0.46, -0.05) | 0.19 (-0.02, 0.39)   | 0.0045 | 0.6072 |
| 224.128  | 12.2  | Cerulein                                              | M+H                  | 2 | -0.09 (-0.3, 0.12)   | 0.23 (0.02, 0.44)    | 0.0333 | 0.7323 |
| 229.0856 | 229.4 | Resveratrol                                           | M+H                  | 2 | -0.46 (-0.84, -0.08) | 0.11 (-0.27, 0.49)   | 0.0408 | 0.7347 |
| 233.0585 | 82.6  | 3-Chloro-1-(4-hydroxy-3-methoxyphenyl)-12-propanediol | M+H                  | 2 | -0.46 (-1.31, 0.39)  | 0.78 (-0.07, 1.63)   | 0.0449 | 0.7390 |
| 239.2003 | 18.5  | Geranyl 3-methylbutanoate                             | M+H                  | 2 | -0.17 (-0.34, 0)     | 0.12 (-0.05, 0.29)   | 0.0183 | 0.7283 |
| 245.0799 | 87.2  | 3345-Tetrahydroxystilbene                             | M+H                  | 2 | 0.39 (0.16, 0.62)    | -0.15 (-0.39, 0.08)  | 0.0022 | 0.5656 |
| 245.1859 | 54.2  | Isoleucyl-Isoleucine                                  | M+H                  | 2 | 0.45 (0.21, 0.69)    | 0.02 (-0.23, 0.26)   | 0.0139 | 0.6948 |
| 251.1276 | 234.7 | Ubiquinone-1                                          | M+H                  | 2 | -0.08 (-0.38, 0.22)  | 0.4 (0.1, 0.7)       | 0.0293 | 0.7318 |
| 251.2003 | 228.2 | Norambreinolide                                       | M+H                  | 2 | 0 (-0.25, 0.25)      | 0.45 (0.2, 0.7)      | 0.0144 | 0.7012 |
| 255.1952 | 19.5  | Lubiminol                                             | M+H                  | 2 | 0.12 (-0.01, 0.25)   | 0.33 (0.2, 0.46)     | 0.0294 | 0.7318 |
| 256.2633 | 150.7 | Palmitic amide                                        | M+H                  | 2 | 0.14 (-0.11, 0.38)   | -0.27 (-0.52, -0.03) | 0.0212 | 0.7283 |
| 261.1805 | 80.8  | Carisoprodol                                          | M+H                  | 2 | 0.93 (-0.42, 2.27)   | -1.14 (-2.48, 0.2)   | 0.0339 | 0.7347 |
| 269.2261 | 43.7  | Vitamin A                                             | M+H-H <sub>2</sub> O | 1 | 0.06 (-0.04, 0.15)   | -0.1 (-0.19, -0.01)  | 0.0196 | 0.7283 |
| 279.2314 | 41.9  | Linolenic acid                                        | M+H                  | 2 | 0.11 (-0.18, 0.4)    | -0.33 (-0.62, -0.05) | 0.0335 | 0.7323 |
| 281.1162 | 51.4  | Levosimendan                                          | M+H                  | 2 | 0.04 (-0.62, 0.7)    | -1.74 (-2.4, -1.08)  | 0.0005 | 0.5624 |
| 284.0091 | 87.9  | Risedronate                                           | M+H                  | 2 | -0.1 (-0.3, 0.11)    | 0.42 (0.22, 0.63)    | 0.0012 | 0.5624 |
| 297.242  | 42.5  | 13S-hydroxyoctadecadienoic acid                       | M+H                  | 2 | 0.19 (-0.12, 0.5)    | -0.28 (-0.59, 0.03)  | 0.0355 | 0.7347 |
| 299.1259 | 24    | 7C-aglycone                                           | M+H                  | 2 | -0.2 (-0.4, -0.01)   | 0.15 (-0.04, 0.35)   | 0.0134 | 0.6948 |
| 313.1428 | 265.7 | 4-(3-Methyl-1-butenyl)-3345-tetrahydroxystilbene      | M+H                  | 2 | 0.43 (-0.16, 1.02)   | -0.44 (-1.03, 0.15)  | 0.0426 | 0.7347 |
| 315.3275 | 16.9  | 120-Eicosanediol                                      | M+H                  | 2 | 0 (-0.41, 0.41)      | 0.79 (0.38, 1.2)     | 0.0086 | 0.6323 |

|          |       |                                                                |                      |   |                      |                      |        |        |
|----------|-------|----------------------------------------------------------------|----------------------|---|----------------------|----------------------|--------|--------|
| 351.0989 | 15.4  | Penicillin V                                                   | M+H                  | 2 | -0.11 (-0.24, 0.02)  | 0.08 (-0.05, 0.21)   | 0.0423 | 0.7347 |
| 355.1095 | 105.6 | Flumioxazin                                                    | M+H                  | 2 | 0.37 (-0.01, 0.74)   | -0.17 (-0.55, 0.2)   | 0.0450 | 0.7390 |
| 365.105  | 103.7 | Disaccharide                                                   | M+Na                 | 1 | 0.57 (-0.13, 1.28)   | -0.53 (-1.23, 0.18)  | 0.0323 | 0.7318 |
| 389.2508 | 24.6  | 56-Dihydroxyprostaglandin F1a                                  | M+H                  | 2 | -0.37 (-0.76, 0.03)  | 0.39 (0, 0.78)       | 0.0093 | 0.6323 |
| 399.1221 | 25    | Methyl acrylate-divinylbenzene completely hydrolyzed copolymer | M+H                  | 2 | -0.1 (-0.16, -0.03)  | 0.07 (0.01, 0.14)    | 0.0006 | 0.5624 |
| 428.3732 | 45.1  | Stearoylcarnitine                                              | M+H                  | 2 | 0.04 (-0.15, 0.23)   | -0.25 (-0.44, -0.06) | 0.0338 | 0.7347 |
| 433.9982 | 83    | Quinoline yellow                                               | M+H                  | 2 | -0.13 (-0.26, -0.01) | 0.08 (-0.04, 0.21)   | 0.0206 | 0.7283 |
| 459.239  | 41.4  | 3-Sulfodeoxycholic acid                                        | M+H                  | 2 | -0.18 (-0.42, 0.07)  | 0.2 (-0.04, 0.45)    | 0.0315 | 0.7318 |
| 476.2769 | 54.6  | LysoPE(18:3)                                                   | M+H                  | 2 | 0.02 (-0.6, 0.64)    | -1.04 (-1.66, -0.42) | 0.0217 | 0.7318 |
| 524.3714 | 57.9  | LysoPC(18:0)                                                   | M+H                  | 1 | -0.03 (-0.15, 0.1)   | -0.21 (-0.34, -0.09) | 0.0403 | 0.7347 |
| 528.3077 | 53.8  | LysoPE(22:5)                                                   | M+H                  | 2 | -0.15 (-0.57, 0.27)  | -0.79 (-1.21, -0.37) | 0.0353 | 0.7347 |
| 546.3552 | 58.4  | LysoPC(20:3)                                                   | M+H                  | 2 | 0.02 (-0.11, 0.16)   | -0.19 (-0.32, -0.05) | 0.0339 | 0.7347 |
| 548.3717 | 57.5  | LysoPC(20:2)                                                   | M+H                  | 2 | 0.2 (0, 0.39)        | -0.1 (-0.29, 0.1)    | 0.0397 | 0.7347 |
| 556.2786 | 63.6  | Enkephalin L                                                   | M+H                  | 2 | 0.07 (-0.52, 0.66)   | -0.83 (-1.42, -0.25) | 0.0364 | 0.7347 |
| 557.4561 | 42.7  | DG(33:4)                                                       | M+H-H <sub>2</sub> O | 2 | -0.03 (-0.45, 0.39)  | -0.7 (-1.11, -0.28)  | 0.0296 | 0.7318 |
| 570.3533 | 57.3  | LysoPC(22:5)                                                   | M+H                  | 2 | -0.03 (-0.16, 0.09)  | -0.24 (-0.36, -0.11) | 0.0257 | 0.7318 |
| 572.3694 | 57.3  | LysoPC(22:4)                                                   | M+H                  | 2 | 0.14 (-0.07, 0.34)   | -0.24 (-0.44, -0.04) | 0.0113 | 0.6570 |
| 577.4823 | 42.8  | DG(33:3)                                                       | M+H                  | 2 | 0.05 (-0.32, 0.42)   | -0.51 (-0.87, -0.14) | 0.0372 | 0.7347 |
| 611.3116 | 62.5  | Isoliensinine                                                  | M+H                  | 2 | 0.29 (-0.07, 0.65)   | -0.23 (-0.59, 0.12)  | 0.0429 | 0.7356 |
| 647.5124 | 55.7  | SM(d18:112:0)                                                  | M+H                  | 2 | 0.31 (-0.1, 0.72)    | -0.46 (-0.87, -0.05) | 0.0107 | 0.6527 |
| 730.5381 | 50.4  | PC(32:2)                                                       | M+H                  | 2 | 0.15 (-0.01, 0.32)   | -0.18 (-0.34, -0.01) | 0.0065 | 0.6072 |
| 732.5535 | 50.3  | PC(32:1)                                                       | M+H                  | 2 | 0.07 (-0.11, 0.24)   | -0.24 (-0.41, -0.06) | 0.0186 | 0.7283 |
| 756.5513 | 49.7  | PC(34:3)                                                       | M+H                  | 2 | 0.16 (0.05, 0.26)    | -0.06 (-0.16, 0.05)  | 0.0079 | 0.6323 |
| 772.5838 | 49.7  | PC(35:2)                                                       | M+H                  | 2 | 0.08 (-0.02, 0.18)   | 0.29 (0.19, 0.39)    | 0.0044 | 0.6072 |
| 797.5274 | 63.2  | PG(38:5)                                                       | M+H                  | 2 | -0.07 (-0.43, 0.29)  | -0.64 (-1, -0.27)    | 0.0317 | 0.7318 |
| 812.6128 | 48.9  | PC(38:3)                                                       | M+H                  | 2 | 0.05 (-0.05, 0.14)   | -0.1 (-0.19, 0)      | 0.0403 | 0.7347 |
| 820.5825 | 48.8  | PE(44:6)                                                       | M+H                  | 2 | 0.14 (-0.22, 0.51)   | 0.72 (0.35, 1.08)    | 0.0309 | 0.7318 |
| 824.6504 | 48.8  | PC(40:3)                                                       | M+H                  | 2 | -0.25 (-0.55, 0.04)  | 0.35 (0.05, 0.64)    | 0.0061 | 0.6072 |
| 830.5652 | 50.2  | PC(40:8)                                                       | M+H                  | 2 | 0.24 (0.07, 0.41)    | 0 (-0.17, 0.17)      | 0.0487 | 0.7410 |
| 838.6271 | 49.4  | PC(40:4)                                                       | M+H                  | 2 | 0.03 (-0.09, 0.16)   | -0.19 (-0.31, -0.06) | 0.0186 | 0.7283 |
| 976.3683 | 73    | 5-Methyltetrahydropteroylpentaglutamate                        | M+H                  | 2 | -0.18 (-0.43, 0.07)  | 0.21 (-0.04, 0.46)   | 0.0310 | 0.7318 |

#### B) C18 / -ESI column

| m/z      | Time (s) | Compound Name                            | Adduct | MSI Level | Control Group Mean $\Delta$ (95% CI) | Treatment Group Mean $\Delta$ (95% CI) | p-value <sup>a</sup> | q-value <sup>b</sup> |
|----------|----------|------------------------------------------|--------|-----------|--------------------------------------|----------------------------------------|----------------------|----------------------|
| 103.04   | 38.9     | 3-Hydroxybutyric acid                    | M-H    | 1         | -0.05 (-0.23, 0.14)                  | 0.35 (0.16, 0.54)                      | 0.0051               | 0.8785               |
| 103.0593 | 16.7     | 1-Pentanethiol                           | M-H    | 2         | -0.31 (-0.93, 0.32)                  | 0.81 (0.18, 1.43)                      | 0.0152               | 0.8969               |
| 104.0353 | 40.2     | Serine                                   | M-H    | 2         | -0.13 (-0.26, 0)                     | 0.2 (0.07, 0.33)                       | 0.0009               | 0.7258               |
| 116.0353 | 34.8     | Acetylglycine                            | M-H    | 2         | -0.11 (-0.41, 0.2)                   | 0.4 (0.09, 0.71)                       | 0.0241               | 0.9366               |
| 124.0074 | 44.1     | Taurine                                  | M-H    | 2         | 0.27 (0.03, 0.52)                    | -0.13 (-0.38, 0.11)                    | 0.0222               | 0.9366               |
| 138.0197 | 11.9     | Hydroxynicotinic acid                    | M-H    | 2         | -0.05 (-0.14, 0.03)                  | 0.11 (0.03, 0.2)                       | 0.0080               | 0.8785               |
| 139.0168 | 40.4     | 3-Hydroxybutyric acid                    | M+Cl   | 1         | 0 (-0.24, 0.24)                      | 0.36 (0.12, 0.6)                       | 0.0371               | 0.9396               |
| 146.0823 | 35.7     | 2-Amino-4-hydroxy-3-methylpentanoic acid | M-H    | 2         | -0.32 (-0.55, -0.09)                 | 0.07 (-0.16, 0.3)                      | 0.0238               | 0.9366               |
| 147.0663 | 18.4     | Mevalonic acid                           | M-H    | 1         | -0.14 (-0.49, 0.21)                  | 0.38 (0.03, 0.73)                      | 0.0436               | 0.9657               |

|          |       |                                                 |         |   |                      |                      |        |        |
|----------|-------|-------------------------------------------------|---------|---|----------------------|----------------------|--------|--------|
| 152.0354 | 294.3 | 3-Hydroxyanthranilic acid                       | M-H     | 2 | -0.41 (-0.74, -0.09) | 0.1 (-0.23, 0.42)    | 0.0307 | 0.9366 |
| 155.0099 | 16.2  | Orotic acid                                     | M-H     | 2 | -0.16 (-0.28, -0.04) | 0.09 (-0.03, 0.21)   | 0.0055 | 0.8785 |
| 157.0507 | 290.5 | Succinylacetone                                 | M-H     | 2 | 0.38 (0.15, 0.62)    | 0.04 (-0.19, 0.28)   | 0.0452 | 0.9657 |
| 160.0616 | 36.5  | Aminoadipic acid                                | M-H     | 2 | -0.16 (-0.32, -0.01) | 0.06 (-0.09, 0.22)   | 0.0456 | 0.9676 |
| 172.0616 | 291.1 | Acetylglutamate 5-semialdehyde                  | M-H     | 2 | -0.1 (-0.29, 0.09)   | 0.28 (0.09, 0.47)    | 0.0074 | 0.8785 |
| 174.0561 | 46.5  | Indole-3-acetic acid                            | M-H     | 1 | -0.07 (-0.31, 0.16)  | 0.27 (0.03, 0.5)     | 0.0467 | 0.9676 |
| 181.018  | 52.1  | Dipropyl trisulfide                             | M-H     | 2 | -0.04 (-0.07, 0)     | 0.02 (-0.02, 0.06)   | 0.0339 | 0.9366 |
| 189.0406 | 41.7  | 3-Dehydroquinone                                | M-H     | 2 | 0.04 (-0.08, 0.16)   | -0.19 (-0.31, -0.07) | 0.0098 | 0.8785 |
| 217.1081 | 289.4 | 3-Hydroxysebacic acid                           | M-H     | 2 | 0.03 (-0.13, 0.19)   | 0.27 (0.1, 0.43)     | 0.0499 | 0.9676 |
| 228.0409 | 273.2 | Amiloride                                       | M-H     | 2 | 0.37 (0.18, 0.56)    | 0.1 (-0.09, 0.28)    | 0.0410 | 0.9518 |
| 229.1081 | 10.3  | Dicyclohexyl disulfide                          | M-H     | 2 | -0.25 (-0.59, 0.08)  | 0.3 (-0.04, 0.63)    | 0.0234 | 0.9366 |
| 237.186  | 199   | Geranyl 3-methylbutanoate                       | M-H     | 2 | 0.14 (-0.19, 0.46)   | -0.38 (-0.71, -0.06) | 0.0306 | 0.9366 |
| 243.1237 | 148.1 | Polyethylene oxidized                           | M-H     | 2 | -0.54 (-0.99, -0.09) | 0.47 (0.02, 0.92)    | 0.0030 | 0.8785 |
| 252.0465 | 47.8  | Sulfamethoxazole                                | M-H     | 2 | -0.01 (-0.11, 0.09)  | 0.16 (0.06, 0.27)    | 0.0164 | 0.9278 |
| 275.2015 | 212.3 | 19-Norandrosterone                              | M-H     | 2 | 0.21 (0.02, 0.41)    | -0.15 (-0.35, 0.05)  | 0.0125 | 0.8785 |
| 277.2173 | 226.8 | Linolenic acid                                  | M-H     | 1 | 0.26 (0.09, 0.43)    | -0.09 (-0.26, 0.08)  | 0.0057 | 0.8785 |
| 311.1352 | 187   | Olanzapine                                      | M-H     | 2 | -0.05 (-0.11, 0.02)  | 0.05 (-0.02, 0.12)   | 0.0477 | 0.9676 |
| 323.2228 | 225.2 | 1-Acetoxy-2-hydroxy-16-heptadecyn-4-one         | M-H     | 2 | 0.25 (0.05, 0.45)    | -0.15 (-0.35, 0.05)  | 0.0076 | 0.8785 |
| 349.2379 | 244.1 | Tetrahydrocorticosterone                        | M-H     | 2 | 0.18 (-0.1, 0.46)    | -0.29 (-0.57, -0.01) | 0.0236 | 0.9366 |
| 357.28   | 266.2 | Tetracosapentaenoic acid (24:5n-6)              | M-H     | 2 | 0.18 (0.03, 0.33)    | -0.13 (-0.28, 0.02)  | 0.0072 | 0.8785 |
| 409.2725 | 210.8 | 58-Epoxy-58-dihydro-10-apo-by-carotene-310-diol | M-H     | 2 | 0.05 (-0.34, 0.43)   | 0.62 (0.24, 1.01)    | 0.0392 | 0.9518 |
| 435.2754 | 86.4  | simvastatin hydroxy acid                        | M-H     | 2 | -0.61 (-1.1, -0.12)  | 0.16 (-0.33, 0.65)   | 0.0311 | 0.9366 |
| 435.2778 | 278.9 | Simvastatin hydroxy acid                        | M-H     | 2 | -0.34 (-0.93, 0.25)  | 0.52 (-0.07, 1.12)   | 0.0449 | 0.9657 |
| 445.3324 | 240.8 | 13-Carboxy-gamma-tocopherol                     | M-H     | 2 | 0.12 (-0.08, 0.32)   | -0.29 (-0.49, -0.09) | 0.0064 | 0.8785 |
| 450.2612 | 196   | LysoPE(16:1)                                    | M-H     | 2 | -0.09 (-0.35, 0.17)  | -0.51 (-0.76, -0.25) | 0.0269 | 0.9366 |
| 473.3625 | 256.9 | Soyasapogenol A                                 | M-H     | 2 | 0.05 (-0.13, 0.22)   | -0.32 (-0.49, -0.15) | 0.0043 | 0.8785 |
| 474.2625 | 193.3 | LysoPE(18:3)                                    | M-H     | 2 | 0 (-0.32, 0.32)      | -0.48 (-0.8, -0.16)  | 0.0422 | 0.9614 |
| 484.2644 | 177.5 | Sarcodon scabrosus Depsipeptide                 | M-H     | 2 | 0.26 (-0.1, 0.62)    | -0.24 (-0.6, 0.11)   | 0.0493 | 0.9676 |
| 497.2864 | 183.6 | Polyporusterone B                               | M+Na-2H | 2 | 0.01 (-0.42, 0.43)   | -0.6 (-1.02, -0.18)  | 0.0469 | 0.9676 |
| 510.2835 | 183.9 | Cytochalasin Ppho                               | M-H     | 2 | 0.23 (-0.29, 0.75)   | -0.63 (-1.15, -0.11) | 0.0239 | 0.9366 |
| 526.2937 | 208   | LysoPE(22:5)                                    | M-H     | 2 | -0.13 (-0.26, 0.01)  | -0.35 (-0.48, -0.21) | 0.0247 | 0.9366 |
| 528.3091 | 216.9 | LysoPE(22:4)                                    | M-H     | 2 | -0.08 (-0.25, 0.09)  | -0.36 (-0.53, -0.19) | 0.0240 | 0.9366 |
| 569.2722 | 166   | Ganoderic acid F                                | M-H     | 2 | 0.07 (-0.17, 0.32)   | -0.44 (-0.68, -0.2)  | 0.0043 | 0.8785 |
| 570.2781 | 183.9 | Kinetensin 4-7                                  | M-H     | 2 | 0.27 (-0.29, 0.82)   | -0.6 (-1.16, -0.04)  | 0.0324 | 0.9366 |
| 573.4528 | 276.8 | DG(33:4)                                        | M-H     | 2 | 0.02 (-0.4, 0.44)    | -0.63 (-1.05, -0.2)  | 0.0354 | 0.9396 |
| 577.4837 | 293.8 | DG(33:2)                                        | M-H     | 2 | 0.09 (-0.38, 0.56)   | -0.69 (-1.16, -0.22) | 0.0242 | 0.9366 |
| 579.3054 | 209.7 | Hordatine B                                     | M-H     | 2 | -0.27 (-0.67, 0.14)  | 0.37 (-0.04, 0.77)   | 0.0309 | 0.9366 |
| 591.3905 | 211.7 | Tuberoside                                      | M-H     | 2 | 0.25 (-0.04, 0.53)   | -0.18 (-0.46, 0.1)   | 0.0452 | 0.9657 |
| 682.303  | 248   | Chitin                                          | M-H     | 2 | -0.18 (-0.37, 0.01)  | 0.14 (-0.05, 0.33)   | 0.0236 | 0.9366 |
| 790.5627 | 265.9 | PS(36:0)                                        | M-H     | 2 | 0.45 (-0.1, 1)       | -0.54 (-1.09, 0.01)  | 0.0157 | 0.8982 |

<sup>a</sup> Mean change values, 95% CIs, and p-values were calculated from linear regression models adjusted for baseline values for each metabolite. Only showing results for m/z features that were confirmed (Level 1) or putatively annotated (Level 2) according to Metabolomics Standard Initiative (MSI) criteria.

<sup>b</sup> q-values were calculated using the Benjamini-Hochberg method



**Table S3:** Concentrations for quantified and confirmed metabolites that were differentially changed from baseline to week 8 in the diet treatment group compared to control group

| Metabolite <sup>a</sup> | Adduct               | Control Group (n=20) |                     | Diet Group (n=20)   |                     | HMDB Range (µM) | HMDB Ref Population    | Source/ Link                  |
|-------------------------|----------------------|----------------------|---------------------|---------------------|---------------------|-----------------|------------------------|-------------------------------|
|                         |                      | Week 0<br>Mean (SD)  | Week 8<br>Mean (SD) | Week 0<br>Mean (SD) | Week 8<br>Mean (SD) |                 |                        |                               |
| Serine                  | M+H                  | 100.1 (15.3)         | 95.6 (20.5)         | 105.7 (22.7)        | 111.3 (17.1)        | 60.0-180.0      | Adult (> 18 yrs)       | <a href="#">Molecular You</a> |
| Acetylglycine           | M+H                  | 0.04 (0.02)          | 0.04 (0.02)         | 0.04 (0.02)         | 0.05 (0.03)         | 109.4 ± 85.6    | Adult (> 18 yrs)       | <a href="#">21359215</a>      |
| 2-Aminobutyric acid     | M+H                  | 8 (2)                | 7.9 (1.8)           | 8.3 (1.6)           | 9.7 (2.1)           | 15.0-31.0       | Adult (> 18 yrs)       | <a href="#">12297216</a>      |
| Creatine                | M+H                  | 72.1 (25.2)          | 68.4 (22.2)         | 70.7 (24.1)         | 79.9 (20.1)         | 87 ± 19         | Adult (>18 yrs)        | <a href="#">15024124</a>      |
| Kynurenine              | M+H                  | 2.2 (0.5)            | 2.2 (0.5)           | 2.2 (0.4)           | 2 (0.4)             | 0.7-3.0         | Adult (> 18 yrs)       | <a href="#">8634758</a>       |
| Indole-3-acetic acid    | M-H                  | 1.9 (1.8)            | 1.7 (1.1)           | 1.2 (0.5)           | 1.5 (0.7)           | 2.9 ± 1.7       | Adult (> 18 yrs)       | <a href="#">22626821</a>      |
| 3-Hydroxybutyric acid   | M-H                  | 220.1 (83.2)         | 226.2 (75)          | 251.9 (62.6)        | 300.7 (104.3)       | 10.6-143.2      | Adult (> 18 yrs)       | <a href="#">21359215</a>      |
| Linolenic acid          | M-H                  | 77.5 (33.2)          | 92.6 (35.0)         | 82.6 (30.3)         | 74.8 (22.1)         | 46.1 ± 21.7     | Adult (> 18 yrs)       | <a href="#">27329611</a>      |
| Retinol (Vitamin A)     | M+H-H <sub>2</sub> O | 7.6 (1.7)            | 7.8 (1.8)           | 7.6 (1.7)           | 7.1 (1.7)           | 0.3-2.1         | Adolescent (13-18 yrs) | <a href="#">7657478</a>       |

<sup>a</sup> Only showing data for select confirmed metabolites that were quantified using reference standardization (Go, 2015; Liu, 2020) and were differentially changed from baseline to week 8 in the diet treatment group compared to control group, as shown in the main text in Figure 3.



**Table S4:** Least squares (LS) mean change values and 95% confidence intervals (CIs) by treatment group for the first and second multidimensional scaling (MDS) axis from PCoA analysis based on Bray-Curtis dissimilarity.

|            |      | Control Group (n=8) |                     |               | Diet Treatment Group (n=10) |               |                      |                      |  |
|------------|------|---------------------|---------------------|---------------|-----------------------------|---------------|----------------------|----------------------|--|
| Taxa Level | Axis | MDS Mean            | Mean Δ <sup>a</sup> | (95% CI)      | Mean Δ <sup>a</sup>         | (95% CI)      | p-value <sup>a</sup> | q-value <sup>b</sup> |  |
| Phylum     | MDS1 | 1.59E-17            | 0.141               | (0.01, 0.27)  | 0.005                       | (-0.11, 0.12) | 0.147                | 0.552                |  |
| Phylum     | MDS2 | 2.43E-17            | -0.057              | (-0.17, 0.06) | 0.020                       | (-0.08, 0.12) | 0.308                | 0.633                |  |
| Class      | MDS1 | -1.85E-17           | 0.000               | (-0.11, 0.11) | -0.095                      | (-0.2, 0.01)  | 0.196                | 0.489                |  |
| Class      | MDS2 | 6.07E-17            | -0.086              | (-0.23, 0.06) | -0.007                      | (-0.14, 0.13) | 0.417                | 0.606                |  |
| Order      | MDS1 | -1.06E-17           | -0.035              | (-0.15, 0.08) | -0.099                      | (-0.2, 0.01)  | 0.393                | 0.607                |  |
| Order      | MDS2 | -2.47E-17           | -0.147              | (-0.29, 0.01) | -0.034                      | (-0.16, 0.1)  | 0.236                | 0.540                |  |
| Family     | MDS1 | 1.57E-17            | 0.019               | (-0.07, 0.11) | -0.043                      | (-0.13, 0.04) | 0.314                | 0.678                |  |
| Family     | MDS2 | 1.39E-17            | 0.004               | (-0.08, 0.09) | -0.012                      | (-0.09, 0.07) | 0.780                | 0.821                |  |
| Genus      | MDS1 | 2.65E-17            | -0.012              | (-0.07, 0.04) | 0.027                       | (-0.02, 0.08) | 0.286                | 0.859                |  |
| Genus      | MDS2 | -1.32E-17           | 0.034               | (-0.06, 0.13) | -0.002                      | (-0.09, 0.08) | 0.561                | 0.885                |  |
| OTU        | MDS1 | 4.80E-17            | -0.008              | (-0.06, 0.04) | -0.005                      | (-0.05, 0.04) | 0.922                | 0.922                |  |
| OTU        | MDS2 | 8.87E-18            | -0.030              | (-0.09, 0.03) | -0.024                      | (-0.08, 0.03) | 0.875                | 0.922                |  |

<sup>a</sup> Mean change values, 95% CIs, and p-values were calculated from linear regression models adjusted for baseline values for each metabolite. Only showing results for the first and second multidimensional scaling (MDS) axes.

<sup>b</sup> q-values were calculated using the Benjamini-Hochberg method

**Table S5:** Least squares (LS) mean change values and 95% confidence intervals (CIs) by treatment group for rarefied microbial diversity measures

| Taxa                  | Control Group (n=8) |               | Diet treatment group (n=10) |               | p-value <sup>a</sup> | q-value <sup>b</sup> |
|-----------------------|---------------------|---------------|-----------------------------|---------------|----------------------|----------------------|
|                       | Mean Δ <sup>a</sup> | (95% CI)      | Mean Δ <sup>a</sup>         | (95% CI)      |                      |                      |
| Shannon Index         |                     |               |                             |               |                      |                      |
| Phylum                | 0.073               | (-0.02, 0.17) | -0.034                      | (-0.12, 0.05) | 0.111                | 0.400                |
| Class                 | 0.074               | (-0.01, 0.16) | 0.014                       | (-0.06, 0.09) | 0.317                | 0.400                |
| Order                 | 0.076               | (-0.01, 0.16) | 0.021                       | (-0.05, 0.09) | 0.359                | 0.400                |
| Family                | 0.127               | (0, 0.25)     | 0.004                       | (-0.11, 0.12) | 0.177                | 0.400                |
| Genus                 | 0.100               | (0.03, 0.17)  | 0.056                       | (-0.01, 0.12) | 0.366                | 0.400                |
| OTU                   | 0.102               | (0, 0.2)      | 0.041                       | (-0.05, 0.13) | 0.355                | 0.400                |
| Inverse Simpson Index |                     |               |                             |               |                      |                      |
| Phylum                | 0.076               | (-0.08, 0.23) | -0.076                      | (-0.21, 0.06) | 0.159                | 0.349                |
| Class                 | 0.068               | (-0.09, 0.22) | -0.047                      | (-0.18, 0.09) | 0.288                | 0.349                |
| Order                 | 0.069               | (-0.09, 0.23) | -0.043                      | (-0.18, 0.1)  | 0.305                | 0.349                |
| Family                | 0.449               | (-0.13, 1.03) | -0.214                      | (-0.72, 0.3)  | 0.115                | 0.349                |
| Genus                 | 0.772               | (-0.68, 2.22) | 0.518                       | (-0.78, 1.81) | 0.785                | 0.822                |
| OTU                   | 2.451               | (-0.31, 5.21) | 0.420                       | (-2.05, 2.89) | 0.261                | 0.349                |
| Richness              |                     |               |                             |               |                      |                      |
| Phylum                | 0.778               | (0.16, 1.4)   | -0.302                      | (-0.85, 0.24) | <b>0.018</b>         | 0.113                |
| Class                 | 1.844               | (0.66, 3.03)  | 0.434                       | (-0.62, 1.49) | <b>0.090</b>         | 0.271                |
| Order                 | 2.098               | (0.65, 3.55)  | 0.821                       | (-0.46, 2.11) | 0.196                | 0.395                |
| Family                | 2.725               | (0.79, 4.66)  | 1.310                       | (-0.42, 3.04) | 0.268                | 0.398                |
| Genus                 | 3.292               | (0.98, 5.61)  | 1.936                       | (-0.13, 4)    | 0.367                | 0.435                |
| OTU                   | 3.981               | (0.73, 7.23)  | 2.525                       | (-0.38, 5.43) | 0.488                | 0.464                |
| Evenness              |                     |               |                             |               |                      |                      |
| Phylum                | -0.023              | (-0.09, 0.04) | 0.008                       | (-0.05, 0.06) | 0.444                | 0.691                |
| Class                 | -0.030              | (-0.07, 0.01) | 0.006                       | (-0.03, 0.04) | 0.223                | 0.691                |
| Order                 | -0.033              | (-0.08, 0.01) | 0.002                       | (-0.04, 0.04) | 0.262                | 0.691                |
| Family                | 0.001               | (-0.03, 0.04) | -0.006                      | (-0.04, 0.02) | 0.756                | 0.831                |
| Genus                 | 0.005               | (-0.01, 0.02) | 0.003                       | (-0.01, 0.02) | 0.859                | 0.920                |
| OTU                   | 0.008               | (-0.01, 0.03) | -0.002                      | (-0.02, 0.02) | 0.454                | 0.691                |

<sup>a</sup> Mean change values, 95% confidence intervals, and p-values were calculated as the least squares means from linear regression models adjusted for baseline values. Bold values indicate a raw p-value that was statistically significant ( $p < 0.05$ ) or borderline significant ( $p < 0.10$ ).

<sup>b</sup> q-values were calculated using the Benjamini-Hochberg method

**Table S6:** Mean change values and 95% confidence intervals (CIs) by treatment group for the log-normalized relative abundance of bacteria according to each taxonomic level

| Taxa   | Name                                                              | Control Group (n=10) |               | Diet Group (n=8) |               | p-value <sup>a</sup> | q-value <sup>b</sup> |
|--------|-------------------------------------------------------------------|----------------------|---------------|------------------|---------------|----------------------|----------------------|
|        |                                                                   | Mean $\Delta^a$      | (95% CI)      | Mean $\Delta^a$  | (95% CI)      |                      |                      |
| Phylum | P_Firmicutes                                                      | 0.015                | (-0.01, 0.04) | -0.015           | (-0.05, 0.02) | 0.183                | 0.730                |
|        | P_Proteobacteria                                                  | 0.166                | (-0.3, 0.63)  | 0.425            | (-0.11, 0.96) | 0.491                | 0.741                |
|        | P_Bacteroidetes                                                   | -0.041               | (-0.17, 0.08) | 0.015            | (-0.13, 0.16) | 0.556                | 0.741                |
|        | P_Actinobacteria                                                  | 0.159                | (-0.15, 0.47) | 0.222            | (-0.13, 0.57) | 0.787                | 0.787                |
| Class  | P_Firmicutes; C_Clostridia                                        | 0.011                | (-0.02, 0.04) | -0.015           | (-0.05, 0.02) | 0.214                | 0.249                |
|        | P_Proteobacteria; C_Betaproteobacteria                            | 0.093                | (-0.41, 0.6)  | 0.485            | (-0.09, 1.06) | 0.332                | 0.226                |
|        | P_Bacteroidetes; C_Bacteroidia                                    | -0.041               | (-0.17, 0.08) | 0.015            | (-0.13, 0.16) | 0.556                | 0.619                |
|        | P_Actinobacteria; C_Coriobacteriia                                | 0.361                | (-0.02, 0.74) | 0.202            | (-0.22, 0.62) | 0.559                | 0.833                |
|        | P_Firmicutes; C_Bacilli                                           | 0.430                | (0.05, 0.81)  | 0.271            | (-0.15, 0.7)  | 0.564                | 0.833                |
|        | P_Actinobacteria; C_Actinobacteria                                | 0.013                | (-0.5, 0.53)  | 0.163            | (-0.42, 0.75) | 0.699                | 0.527                |
|        | P_Proteobacteria; C_Gammaproteobacteria                           | 0.335                | (-0.27, 0.95) | 0.473            | (-0.21, 1.16) | 0.754                | 0.833                |
|        | P_Proteobacteria; C_Deltaproteobacteria                           | 0.283                | (-0.18, 0.75) | 0.214            | (-0.31, 0.74) | 0.839                | 0.833                |
|        | P_Firmicutes; C_Erysipelotrichi                                   | 0.117                | (-0.26, 0.49) | 0.168            | (-0.25, 0.59) | 0.851                | 0.833                |
|        | P_Firmicutes; C_Clostridia; O_Clostridiales                       | 0.011                | (-0.02, 0.04) | -0.015           | (-0.05, 0.02) | 0.214                | 0.249                |
| Order  | P_Proteobacteria; C_Betaproteobacteria; O_Burkholderiales         | 0.093                | (-0.41, 0.6)  | 0.485            | (-0.09, 1.06) | 0.332                | 0.226                |
|        | P_Proteobacteria; C_Gammaproteobacteria; O_Enterobacteriales      | 0.249                | (-0.4, 0.9)   | 0.640            | (-0.09, 1.37) | 0.408                | 0.694                |
|        | P_Firmicutes; C_Bacilli; O_Lactobacillales                        | 0.533                | (0.11, 0.96)  | 0.283            | (-0.19, 0.76) | 0.417                | 0.694                |
|        | P_Bacteroidetes; C_Bacteroidia; O_Bacteroidales                   | -0.041               | (-0.17, 0.08) | 0.015            | (-0.13, 0.16) | 0.556                | 0.619                |
|        | P_Actinobacteria; C_Coriobacteriia; O_Coriobacteriales            | 0.361                | (-0.02, 0.74) | 0.202            | (-0.22, 0.62) | 0.559                | 0.694                |
|        | P_Actinobacteria; C_Actinobacteria; O_Bifidobacteriales           | 0.013                | (-0.5, 0.53)  | 0.163            | (-0.42, 0.75) | 0.699                | 0.527                |
|        | P_Proteobacteria; C_Deltaproteobacteria; O_Desulfovibrionales     | 0.283                | (-0.18, 0.75) | 0.214            | (-0.31, 0.74) | 0.839                | 0.793                |
|        | P_Firmicutes; C_Erysipelotrichi; O_Erysipelotrichales             | 0.117                | (-0.26, 0.49) | 0.168            | (-0.25, 0.59) | 0.851                | 0.694                |
| Family | P_Firmicutes; C_Bacilli; O_Lactobacillales; F_Lactobacillaceae    | 0.229                | (-0.08, 0.54) | -0.225           | (-0.58, 0.13) | <b>0.060</b>         | 0.779                |
|        | P_Firmicutes; C_Clostridia; O_Clostridiales; F_Lachnospiraceae    | 0.018                | (-0.04, 0.07) | -0.060           | (-0.12, 0)    | <b>0.089</b>         | 0.779                |
|        | P_Bacteroidetes; C_Bacteroidia; O_Bacteroidales; F_Prevotellaceae | 0.079                | (-0.19, 0.35) | -0.249           | (-0.56, 0.06) | 0.127                | 0.779                |
|        | P_Bacteroidetes; C_Bacteroidia; O_Bacteroidales; F_Bacteroidaceae | -0.082               | (-0.2, 0.04)  | 0.047            | (-0.09, 0.18) | 0.156                | 0.779                |
|        | P_Firmicutes; C_Clostridia; O_Clostridiales; F_                   | -0.132               | (-0.52, 0.25) | 0.241            | (-0.19, 0.67) | 0.191                | 0.779                |

|       |                                                                                                |        |               |        |               |              |       |
|-------|------------------------------------------------------------------------------------------------|--------|---------------|--------|---------------|--------------|-------|
|       | P_Firmicutes; C_Clostridia; O_Clostridiales; F_Clostridiaceae                                  | -0.130 | (-0.36, 0.1)  | 0.091  | (-0.17, 0.35) | 0.212        | 0.779 |
|       | P_Firmicutes; C_Clostridia; O_Clostridiales;<br>F_Mogibacteriaceae                             | 0.313  | (-0.04, 0.67) | 0.641  | (0.24, 1.04)  | 0.235        | 0.779 |
|       | P_Bacteroidetes; C_Bacteroidia; O_Bacteroidales;<br>F_Rikenellaceae                            | 0.025  | (-0.34, 0.39) | 0.330  | (-0.08, 0.74) | 0.260        | 0.779 |
|       | P_Firmicutes; C_Clostridia; O_Clostridiales;<br>F_Christensenellaceae                          | -0.109 | (-0.62, 0.41) | 0.287  | (-0.29, 0.86) | 0.293        | 0.782 |
|       | P_Proteobacteria; C_Betaproteobacteria; O_Burkholderiales;<br>F_Alcaligenaceae                 | 0.093  | (-0.41, 0.6)  | 0.485  | (-0.09, 1.06) | 0.332        | 0.797 |
|       | P_Proteobacteria; C_Gammaproteobacteria;<br>O_Enterobacteriales; F_Enterobacteriaceae          | 0.249  | (-0.4, 0.9)   | 0.640  | (-0.09, 1.37) | 0.408        | 0.823 |
|       | P_Firmicutes; C_Clostridia; O_Clostridiales;<br>F_Ruminococcaceae                              | 0.175  | (0.11, 0.24)  | 0.211  | (0.14, 0.28)  | 0.438        | 0.823 |
|       | P_Bacteroidetes; C_Bacteroidia; O_Bacteroidales;<br>F_Paraprevotellaceae                       | 0.172  | (-0.15, 0.49) | -0.007 | (-0.37, 0.35) | 0.446        | 0.823 |
|       | P_Firmicutes; C_Bacilli; O_Lactobacillales;<br>F_Enterococcaceae                               | 0.209  | (-0.41, 0.83) | 0.486  | (-0.21, 1.18) | 0.534        | 0.838 |
|       | P_Firmicutes; C_Bacilli; O_Lactobacillales;<br>F_Streptococcaceae                              | 0.370  | (-0.21, 0.95) | 0.109  | (-0.54, 0.76) | 0.535        | 0.838 |
|       | P_Actinobacteria; C_Coriobacteriia; O_Coriobacteriales;<br>F_Coriobacteriaceae                 | 0.361  | (-0.02, 0.74) | 0.202  | (-0.22, 0.62) | 0.559        | 0.838 |
|       | P_Bacteroidetes; C_Bacteroidia; O_Bacteroidales;<br>F_Porphyromonadaceae                       | -0.190 | (-0.77, 0.39) | 0.016  | (-0.63, 0.66) | 0.628        | 0.887 |
|       | P_Actinobacteria; C_Actinobacteria; O_Bifidobacteriales;<br>F_Bifidobacteriaceae               | 0.013  | (-0.5, 0.53)  | 0.163  | (-0.42, 0.75) | 0.699        | 0.932 |
|       | P_Bacteroidetes; C_Bacteroidia; O_Bacteroidales;<br>F_Barnesiellaceae                          | -0.097 | (-0.4, 0.21)  | -0.036 | (-0.38, 0.31) | 0.787        | 0.932 |
|       | P_Proteobacteria; C_Deltaproteobacteria;<br>O_Desulfovibrionales; F_Desulfovibrionaceae        | 0.283  | (-0.18, 0.75) | 0.214  | (-0.31, 0.74) | 0.839        | 0.932 |
|       | P_Firmicutes; C_Erysipelotrichi; O_Erysipelotrichales;<br>F_Erysipelotrichaceae                | 0.117  | (-0.26, 0.49) | 0.168  | (-0.25, 0.59) | 0.851        | 0.932 |
|       | P_Firmicutes; C_Clostridia; O_Clostridiales; F__Unclassified                                   | 0.074  | (-0.17, 0.32) | 0.042  | (-0.23, 0.31) | 0.855        | 0.932 |
|       | P_Firmicutes; C_Clostridia; O_Clostridiales; F_Veillonellaceae                                 | -0.034 | (-0.49, 0.42) | -0.013 | (-0.53, 0.5)  | 0.949        | 0.990 |
|       | P_Bacteroidetes; C_Bacteroidia; O_Bacteroidales;<br>F_Odoribacteraceae                         | 0.130  | (-0.3, 0.56)  | 0.129  | (-0.36, 0.61) | 0.996        | 0.996 |
| Genus | P_Firmicutes; C_Clostridia; O_Clostridiales;<br>F_Ruminococcaceae; G__Unclassified             | -0.083 | (-0.26, 0.1)  | 0.327  | (0.13, 0.53)  | <b>0.006</b> | 0.238 |
|       | P_Firmicutes; C_Clostridia; O_Clostridiales;<br>F_Veillonellaceae; G_Phascolartobacterium      | -0.211 | (-0.49, 0.07) | 0.250  | (-0.06, 0.56) | <b>0.035</b> | 0.702 |
|       | P_Firmicutes; C_Bacilli; O_Lactobacillales;<br>F_Lactobacillaceae; G_Lactobacillus             | 0.229  | (-0.08, 0.54) | -0.225 | (-0.58, 0.13) | <b>0.060</b> | 0.702 |
|       | P_Firmicutes; C_Erysipelotrichi; O_Erysipelotrichales;<br>F_Erysipelotrichaceae; G_Eubacterium | 0.262  | (-0.06, 0.59) | -0.150 | (-0.51, 0.21) | <b>0.096</b> | 0.702 |
|       | P_Firmicutes; C_Clostridia; O_Clostridiales;<br>F_Lachnospiraceae; G_Lachnobacterium           | 0.461  | (-0.15, 1.07) | -0.313 | (-1, 0.37)    | <b>0.097</b> | 0.702 |

|                                                                                                      |        |               |        |               |       |       |
|------------------------------------------------------------------------------------------------------|--------|---------------|--------|---------------|-------|-------|
| P_Bacteroidetes; C_Bacteroidia; O_Bacteroidales;<br>F_Prevotellaceae; G_Prevotella                   | 0.079  | (-0.19, 0.35) | -0.249 | (-0.56, 0.06) | 0.127 | 0.702 |
| P_Firmicutes; C_Clostridia; O_Clostridiales;<br>F_Veillonellaceae; G_Dialister                       | 0.164  | (-0.21, 0.54) | -0.236 | (-0.65, 0.18) | 0.149 | 0.702 |
| P_Bacteroidetes; C_Bacteroidia; O_Bacteroidales;<br>F_Bacteroidaceae; G_Bacteroides                  | -0.082 | (-0.2, 0.04)  | 0.047  | (-0.09, 0.18) | 0.156 | 0.702 |
| P_Proteobacteria; C_Gammaproteobacteria;<br>O_Enterobacteriales; F_Enterobacteriaceae; G_Escherichia | 0.096  | (-0.47, 0.67) | 0.703  | (0.06, 1.34)  | 0.161 | 0.702 |
| P_Firmicutes; C_Erysipelotrichi; O_Erysipelotrichales;<br>F_Erysipelotrichaceae; G_Clostridium       | -0.005 | (-0.28, 0.27) | 0.286  | (-0.02, 0.59) | 0.167 | 0.702 |
| P_Firmicutes; C_Clostridia; O_Clostridiales; F_Unclassified;<br>G_Unclassified                       | -0.132 | (-0.52, 0.25) | 0.241  | (-0.19, 0.67) | 0.191 | 0.702 |
| P_Firmicutes; C_Clostridia; O_Clostridiales;<br>F_Lachnospiraceae; G_Ruminococcus                    | -0.007 | (-0.14, 0.12) | -0.131 | (-0.28, 0.02) | 0.201 | 0.702 |
| P_Firmicutes; C_Clostridia; O_Clostridiales;<br>F_Mogibacteriaceae; G_Unclassified                   | 0.313  | (-0.04, 0.67) | 0.641  | (0.24, 1.04)  | 0.235 | 0.760 |
| P_Bacteroidetes; C_Bacteroidia; O_Bacteroidales;<br>F_Rikenellaceae; G_Unclassified                  | 0.029  | (-0.33, 0.39) | 0.332  | (-0.08, 0.74) | 0.261 | 0.762 |
| P_Firmicutes; C_Clostridia; O_Clostridiales;<br>F_Ruminococcaceae; G_Gemmiger                        | 0.006  | (-0.08, 0.09) | 0.076  | (-0.02, 0.17) | 0.272 | 0.762 |
| P_Firmicutes; C_Clostridia; O_Clostridiales;<br>F_Christensenellaceae; G_Unclassified                | -0.109 | (-0.62, 0.41) | 0.287  | (-0.29, 0.86) | 0.293 | 0.766 |
| P_Firmicutes; C_Clostridia; O_Clostridiales;<br>F_Lachnospiraceae; G_Roseburia                       | 0.180  | (0.04, 0.32)  | 0.076  | (-0.08, 0.23) | 0.310 | 0.766 |
| P_Proteobacteria; C_Betaproteobacteria; O_Burkholderiales;<br>F_Alcaligenaceae; G_Sutterella         | 0.093  | (-0.41, 0.6)  | 0.485  | (-0.09, 1.06) | 0.332 | 0.775 |
| P_Bacteroidetes; C_Bacteroidia; O_Bacteroidales;<br>F_Paraprevotellaceae; G_Paraprevotella           | 0.222  | (-0.09, 0.53) | 0.021  | (-0.33, 0.37) | 0.373 | 0.814 |
| P_Firmicutes; C_Clostridia; O_Clostridiales;<br>F_Lachnospiraceae; G_Unclassified                    | 0.187  | (0.09, 0.29)  | 0.125  | (0.01, 0.24)  | 0.391 | 0.814 |
| P_Firmicutes; C_Clostridia; O_Clostridiales;<br>F_Ruminococcaceae; G_Ruminococcus                    | -0.071 | (-0.26, 0.12) | 0.041  | (-0.17, 0.26) | 0.425 | 0.814 |
| P_Firmicutes; C_Clostridia; O_Clostridiales; F_Clostridiaceae;<br>G_SMB53                            | 0.462  | (-0.16, 1.09) | 0.139  | (-0.56, 0.84) | 0.477 | 0.814 |
| P_Firmicutes; C_Clostridia; O_Clostridiales;<br>F_Lachnospiraceae; G_Anaerostipes                    | -0.075 | (-0.72, 0.57) | 0.248  | (-0.47, 0.97) | 0.489 | 0.814 |
| P_Firmicutes; C_Clostridia; O_Clostridiales;<br>F_Ruminococcaceae; G_Oscillospira                    | 0.201  | (-0.18, 0.59) | 0.016  | (-0.42, 0.45) | 0.510 | 0.814 |
| P_Firmicutes; C_Clostridia; O_Clostridiales;<br>F_Lachnospiraceae; G_Blautia                         | -0.020 | (-0.12, 0.08) | -0.066 | (-0.18, 0.05) | 0.532 | 0.814 |
| P_Firmicutes; C_Bacilli; O_Lactobacillales;<br>F_Enterococcaceae; G_Enterococcus                     | 0.209  | (-0.41, 0.83) | 0.486  | (-0.21, 1.18) | 0.534 | 0.814 |
| P_Firmicutes; C_Clostridia; O_Clostridiales;<br>F_Lachnospiraceae; G_Lachnospira                     | -0.263 | (-0.89, 0.36) | -0.010 | (-0.71, 0.69) | 0.578 | 0.814 |

|     |                                                                                                            |        |               |        |               |              |       |
|-----|------------------------------------------------------------------------------------------------------------|--------|---------------|--------|---------------|--------------|-------|
| OTU | P_Firmicutes; C_Erysipelotrichi; O_Erysipelotrichales;<br>F_Erysipelotrichaceae; G_Unclassified            | 0.089  | (-0.47, 0.65) | -0.117 | (-0.74, 0.51) | 0.608        | 0.814 |
|     | P_Firmicutes; C_Clostridia; O_Clostridiales;<br>F_Ruminococcaceae; G_Faecalibacterium                      | 0.176  | (0.09, 0.26)  | 0.146  | (0.05, 0.24)  | 0.616        | 0.814 |
|     | P_Bacteroidetes; C_Bacteroidia; O_Bacteroidales;<br>F_Porphyromonadaceae; G_Parabacteroides                | -0.192 | (-0.77, 0.38) | 0.016  | (-0.63, 0.66) | 0.625        | 0.814 |
|     | P_Firmicutes; C_Clostridia; O_Clostridiales;<br>F_Lachnospiraceae; G_Coproccoccus                          | 0.058  | (-0.03, 0.15) | 0.026  | (-0.08, 0.13) | 0.636        | 0.814 |
|     | P_Actinobacteria; C_Coriobacteriia; O_Coriobacteriales;<br>F_Coriobacteriaceae; G_Collinsella              | 0.325  | (-0.04, 0.69) | 0.202  | (-0.21, 0.61) | 0.638        | 0.814 |
|     | P_Firmicutes; C_Clostridia; O_Clostridiales; F_Clostridiaceae;<br>G_Unclassified                           | 0.021  | (-0.68, 0.72) | 0.261  | (-0.53, 1.05) | 0.640        | 0.814 |
|     | P_Firmicutes; C_Clostridia; O_Clostridiales;<br>F_Lachnospiraceae; G_Dorea                                 | 0.008  | (-0.08, 0.09) | -0.017 | (-0.11, 0.08) | 0.677        | 0.836 |
|     | P_Actinobacteria; C_Actinobacteria; O_Bifidobacteriales;<br>F_Bifidobacteriaceae; G_Bifidobacterium        | 0.013  | (-0.5, 0.53)  | 0.163  | (-0.42, 0.75) | 0.699        | 0.839 |
|     | P_Bacteroidetes; C_Bacteroidia; O_Bacteroidales;<br>F_Barnesiellaceae; G_unclassified                      | -0.097 | (-0.4, 0.21)  | -0.036 | (-0.38, 0.31) | 0.787        | 0.918 |
|     | P_Firmicutes; C_Clostridia; O_Clostridiales; F__Unclassified;<br>G_Unclassified                            | 0.074  | (-0.17, 0.32) | 0.042  | (-0.23, 0.31) | 0.855        | 0.967 |
|     | P_Firmicutes; C_Clostridia; O_Clostridiales;<br>F_Ruminococcaceae; G_Unclassified                          | 0.182  | (-0.24, 0.6)  | 0.230  | (-0.24, 0.7)  | 0.875        | 0.967 |
|     | P_Firmicutes; C_Clostridia; O_Clostridiales;<br>F_Lachnospiraceae; G_Unclassified                          | -0.052 | (-0.25, 0.14) | -0.070 | (-0.29, 0.15) | 0.902        | 0.971 |
|     | P_Firmicutes; C_Clostridia; O_Clostridiales; F_Clostridiaceae;<br>G_Clostridium                            | -0.188 | (-0.64, 0.26) | -0.182 | (-0.69, 0.32) | 0.984        | 1.000 |
|     | P_Bacteroidetes; C_Bacteroidia; O_Bacteroidales;<br>F_Odoribacteraceae; G_Odoribacter                      | 0.130  | (-0.3, 0.56)  | 0.127  | (-0.36, 0.61) | 0.992        | 1.000 |
|     | P_Firmicutes; C_Bacilli; O_Lactobacillales;<br>F_Streptococcaceae; G_Streptococcus                         | 0.161  | (-0.4, 0.73)  | 0.161  | (-0.47, 0.79) | 1.000        | 1.000 |
|     | P_Firmicutes; C_Clostridia; O_Clostridiales;<br>F_Ruminococcaceae; G_Unclassified; S_unclassified          | -0.083 | (-0.26, 0.1)  | 0.327  | (0.13, 0.53)  | <b>0.006</b> | 0.318 |
|     | P_Firmicutes; C_Clostridia; O_Clostridiales;<br>F_Ruminococcaceae; G_Ruminococcus; S_bromii                | -0.119 | (-0.33, 0.09) | 0.252  | (0.02, 0.49)  | <b>0.026</b> | 0.649 |
|     | P_Firmicutes; C_Clostridia; O_Clostridiales;<br>F_Veillonellaceae; G_Phascolarctobacterium; S_unclassified | -0.211 | (-0.49, 0.07) | 0.250  | (-0.06, 0.56) | <b>0.035</b> | 0.649 |
|     | P_Firmicutes; C_Clostridia; O_Clostridiales;<br>F_Lachnospiraceae; G_Lachnobacterium; S_unclassified       | 0.461  | (-0.15, 1.07) | -0.313 | (-1, 0.37)    | <b>0.097</b> | 0.785 |
|     | P_Bacteroidetes; C_Bacteroidia; O_Bacteroidales;<br>F_Porphyromonadaceae; G_Parabacteroides; S_distasonis  | -0.699 | (-1.19, -0.2) | -0.114 | (-0.67, 0.44) | 0.124        | 0.785 |
|     | P_Firmicutes; C_Clostridia; O_Clostridiales;<br>F_Veillonellaceae; G_Dialister; S_unclassified             | 0.164  | (-0.21, 0.54) | -0.236 | (-0.65, 0.18) | 0.149        | 0.785 |
|     | P_Bacteroidetes; C_Bacteroidia; O_Bacteroidales;<br>F_Prevotellaceae; G_Prevotella; S_copri                | 0.103  | (-0.14, 0.35) | -0.175 | (-0.45, 0.1)  | 0.165        | 0.785 |

|                                                                                                                     |        |                |        |               |       |       |
|---------------------------------------------------------------------------------------------------------------------|--------|----------------|--------|---------------|-------|-------|
| P_Firmicutes; C_Erysipelotrichi; O_Erysipelotrichales;<br>F_Erysipelotrichaceae; G_Clostridium; S_spiroforme        | -0.005 | (-0.28, 0.27)  | 0.286  | (-0.02, 0.59) | 0.167 | 0.785 |
| P_Bacteroidetes; C_Bacteroidia; O_Bacteroidales;<br>F_Bacteroidaceae; G_Bacteroides; S_ovatus                       | -0.026 | (-0.42, 0.37)  | 0.386  | (-0.06, 0.83) | 0.175 | 0.785 |
| P_Firmicutes; C_Clostridia; O_Clostridiales;<br>F_Lachnospiraceae; G_Ruminococcus; S_unclassified                   | 0.087  | (-0.33, 0.5)   | -0.339 | (-0.8, 0.13)  | 0.180 | 0.785 |
| P_Firmicutes; C_Clostridia; O_Clostridiales; F_Unclassified;<br>G_Unclassified; S_unclassified                      | -0.132 | (-0.52, 0.25)  | 0.241  | (-0.19, 0.67) | 0.191 | 0.785 |
| P_Bacteroidetes; C_Bacteroidia; O_Bacteroidales;<br>F_Bacteroidaceae; G_Bacteroides; S_unclassified                 | -0.139 | (-0.27, -0.01) | -0.021 | (-0.17, 0.13) | 0.223 | 0.785 |
| P_Actinobacteria; C_Actinobacteria; O_Bifidobacteriales;<br>F_Bifidobacteriaceae; G_Bifidobacterium; S_unclassified | -0.128 | (-0.62, 0.36)  | 0.312  | (-0.24, 0.86) | 0.226 | 0.785 |
| P_Firmicutes; C_Clostridia; O_Clostridiales;<br>F_Mogibacteriaceae; G_Unclassified; S_unclassified                  | 0.313  | (-0.04, 0.67)  | 0.641  | (0.24, 1.04)  | 0.235 | 0.785 |
| P_Firmicutes; C_Clostridia; O_Clostridiales;<br>F_Lachnospiraceae; G_Dorea; S_unclassified                          | 0.034  | (-0.07, 0.14)  | -0.053 | (-0.17, 0.06) | 0.259 | 0.785 |
| P_Bacteroidetes; C_Bacteroidia; O_Bacteroidales;<br>F_Rikenellaceae; G_Unclassified; S_unclassified                 | 0.029  | (-0.33, 0.39)  | 0.332  | (-0.08, 0.74) | 0.261 | 0.785 |
| P_Firmicutes; C_Clostridia; O_Clostridiales;<br>F_Lachnospiraceae; G_Roseburia; S_unclassified                      | 0.242  | (-0.1, 0.59)   | -0.037 | (-0.42, 0.35) | 0.269 | 0.785 |
| P_Firmicutes; C_Clostridia; O_Clostridiales;<br>F_Ruminococcaceae; G_Gemmiger; S_formicilis                         | 0.006  | (-0.08, 0.09)  | 0.076  | (-0.02, 0.17) | 0.272 | 0.785 |
| P_Firmicutes; C_Erysipelotrichi; O_Erysipelotrichales;<br>F_Erysipelotrichaceae; G_Eubacterium; S_biforme           | 0.035  | (-0.21, 0.28)  | -0.161 | (-0.44, 0.12) | 0.278 | 0.785 |
| P_Firmicutes; C_Clostridia; O_Clostridiales;<br>F_Christensenellaceae; G_Unclassified; S_unclassified               | -0.109 | (-0.62, 0.41)  | 0.287  | (-0.29, 0.86) | 0.293 | 0.785 |
| P_Firmicutes; C_Clostridia; O_Clostridiales;<br>F_Ruminococcaceae; G_Ruminococcus; S_unclassified                   | -0.173 | (-0.4, 0.05)   | -0.003 | (-0.26, 0.25) | 0.313 | 0.785 |
| P_Firmicutes; C_Clostridia; O_Clostridiales;<br>F_Lachnospiraceae; G_Blautia; S_obeum                               | -0.073 | (-0.53, 0.39)  | 0.263  | (-0.25, 0.77) | 0.318 | 0.785 |
| P_Proteobacteria; C_Betaproteobacteria; O_Burkholderiales;<br>F_Alcaligenaceae; G_Sutterella; S_unclassified        | 0.093  | (-0.41, 0.6)   | 0.485  | (-0.09, 1.06) | 0.332 | 0.785 |
| P_Firmicutes; C_Clostridia; O_Clostridiales;<br>F_Lachnospiraceae; G_Roseburia; S_unclassified                      | 0.175  | (-0.25, 0.6)   | -0.130 | (-0.61, 0.35) | 0.336 | 0.785 |
| P_Firmicutes; C_Clostridia; O_Clostridiales;<br>F_Lachnospiraceae; G_Roseburia; S_faecis                            | 0.155  | (-0.21, 0.52)  | -0.086 | (-0.49, 0.32) | 0.372 | 0.833 |
| P_Firmicutes; C_Clostridia; O_Clostridiales;<br>F_Lachnospiraceae; G_Unclassified; S_unclassified                   | 0.187  | (0.09, 0.29)   | 0.125  | (0.01, 0.24)  | 0.391 | 0.842 |
| P_Firmicutes; C_Clostridia; O_Clostridiales;<br>F_Lachnospiraceae; G_Ruminococcus; S_torques                        | -0.116 | (-0.73, 0.49)  | 0.248  | (-0.44, 0.93) | 0.421 | 0.842 |
| P_Actinobacteria; C_Coriobacteriia; O_Coriobacteriales;<br>F_Coriobacteriaceae; G_Collinsella; S_aerofaciens        | 0.335  | (-0.04, 0.71)  | 0.120  | (-0.3, 0.54)  | 0.426 | 0.842 |
| P_Bacteroidetes; C_Bacteroidia; O_Bacteroidales;<br>F_Bacteroidaceae; G_Bacteroides_unclassified                    | -0.126 | (-0.48, 0.23)  | 0.061  | (-0.34, 0.46) | 0.467 | 0.842 |

|                                                                                                                 |        |               |        |               |       |       |
|-----------------------------------------------------------------------------------------------------------------|--------|---------------|--------|---------------|-------|-------|
| P_Firmicutes; C_Clostridia; O_Clostridiales; F_Clostridiaceae;<br>G_SMB53; S_unclassified                       | 0.462  | (-0.16, 1.09) | 0.139  | (-0.56, 0.84) | 0.477 | 0.842 |
| P_Bacteroidetes; C_Bacteroidia; O_Bacteroidales;<br>F_Porphyrimonadaceae; G_Parabacteroides; S_unclassified     | 0.251  | (-0.21, 0.71) | 0.019  | (-0.49, 0.53) | 0.485 | 0.842 |
| P_Firmicutes; C_Clostridia; O_Clostridiales;<br>F_Lachnospiraceae; G_Anaerostipes; S_unclassified               | -0.075 | (-0.72, 0.57) | 0.248  | (-0.47, 0.97) | 0.489 | 0.842 |
| P_Firmicutes; C_Clostridia; O_Clostridiales;<br>F_Ruminococcaceae; G_Oscillospira; S_unclassified               | 0.201  | (-0.18, 0.59) | 0.016  | (-0.42, 0.45) | 0.510 | 0.842 |
| P_Firmicutes; C_Clostridia; O_Clostridiales;<br>F_Lachnospiraceae; G_Blautia; S_unclassified                    | -0.019 | (-0.11, 0.08) | -0.063 | (-0.17, 0.04) | 0.521 | 0.842 |
| P_Bacteroidetes; C_Bacteroidia; O_Bacteroidales;<br>F_Bacteroidaceae; G_Bacteroides; S_uniformis                | -0.086 | (-0.71, 0.54) | 0.187  | (-0.52, 0.89) | 0.555 | 0.842 |
| P_Firmicutes; C_Clostridia; O_Clostridiales;<br>F_Ruminococcaceae; G_Ruminococcus; S_unclassified               | 0.157  | (-0.49, 0.81) | -0.105 | (-0.83, 0.62) | 0.576 | 0.842 |
| P_Firmicutes; C_Clostridia; O_Clostridiales;<br>F_Lachnospiraceae; G_Lachnospira; S_unclassified                | -0.263 | (-0.89, 0.36) | -0.010 | (-0.71, 0.69) | 0.578 | 0.842 |
| P_Firmicutes; C_Clostridia; O_Clostridiales;<br>F_Lachnospiraceae; G_Coprococcus; S_catus                       | 0.238  | (-0.09, 0.56) | 0.106  | (-0.26, 0.47) | 0.578 | 0.842 |
| P_Firmicutes; C_Clostridia; O_Clostridiales;<br>F_Lachnospiraceae; G_Ruminococcus; S_gnavus                     | 0.166  | (0.01, 0.32)  | 0.106  | (-0.07, 0.28) | 0.598 | 0.842 |
| P_Firmicutes; C_Erysipelotrichi; O_Erysipelotrichales;<br>F_Erysipelotrichaceae; G_Unclassified; S_unclassified | 0.089  | (-0.47, 0.65) | -0.117 | (-0.74, 0.51) | 0.608 | 0.842 |
| P_Firmicutes; C_Clostridia; O_Clostridiales;<br>F_Ruminococcaceae; G_Faecalibacterium; S_prausnitzii            | 0.176  | (0.09, 0.26)  | 0.146  | (0.05, 0.24)  | 0.616 | 0.842 |
| P_Firmicutes; C_Clostridia; O_Clostridiales; F_Clostridiaceae;<br>G_Unclassified; S_unclassified                | 0.021  | (-0.68, 0.72) | 0.261  | (-0.53, 1.05) | 0.640 | 0.853 |
| P_Firmicutes; C_Clostridia; O_Clostridiales;<br>F_Lachnospiraceae; G_Coprococcus; S_eutactus                    | 0.184  | (-0.18, 0.55) | 0.079  | (-0.33, 0.49) | 0.689 | 0.894 |
| P_Firmicutes; C_Bacilli; O_Lactobacillales;<br>F_Streptococcaceae; G_Streptococcus; S_unclassified              | 0.001  | (-0.62, 0.62) | 0.170  | (-0.52, 0.86) | 0.706 | 0.894 |
| P_Bacteroidetes; C_Bacteroidia; O_Bacteroidales;<br>F_Bacteroidaceae; G_Bacteroides; S_caccae                   | -0.294 | (-0.86, 0.27) | -0.154 | (-0.79, 0.48) | 0.734 | 0.894 |
| P_Firmicutes; C_Clostridia; O_Clostridiales;<br>F_Lachnospiraceae; G_Coprococcus; S_unclassified                | 0.011  | (-0.11, 0.13) | -0.018 | (-0.15, 0.11) | 0.735 | 0.894 |
| P_Bacteroidetes; C_Bacteroidia; O_Bacteroidales;<br>F_Barnesiellaceae; G_Unclassified; S_unclassified           | -0.097 | (-0.4, 0.21)  | -0.036 | (-0.38, 0.31) | 0.787 | 0.920 |
| P_Firmicutes; C_Clostridia; O_Clostridiales;<br>F_Ruminococcaceae; G_Ruminococcus; S_callidus                   | 0.132  | (-0.23, 0.49) | 0.201  | (-0.2, 0.6)   | 0.789 | 0.920 |
| P_Firmicutes; C_Clostridia; O_Clostridiales; F_Clostridiaceae;<br>G_Clostridium; S_unclassified                 | -0.166 | (-0.67, 0.34) | -0.078 | (-0.65, 0.49) | 0.817 | 0.934 |
| P_Firmicutes; C_Clostridia; O_Clostridiales; F_Unclassified;<br>G_unclassified; S_unclassified                  | 0.074  | (-0.17, 0.32) | 0.042  | (-0.23, 0.31) | 0.855 | 0.935 |
| P_Firmicutes; C_Clostridia; O_Clostridiales;<br>F_Ruminococcaceae; G_Unclassified; S_unclassified               | 0.182  | (-0.24, 0.6)  | 0.230  | (-0.24, 0.7)  | 0.875 | 0.935 |



|                                                                                                                     |        |               |        |               |       |       |
|---------------------------------------------------------------------------------------------------------------------|--------|---------------|--------|---------------|-------|-------|
| P_Actinobacteria; C_Actinobacteria; O_Bifidobacteriales;<br>F_Bifidobacteriaceae; G_Bifidobacterium; S_longum       | -0.020 | (-0.55, 0.51) | 0.038  | (-0.56, 0.63) | 0.879 | 0.935 |
| P_Actinobacteria; C_Actinobacteria; O_Bifidobacteriales;<br>F_Bifidobacteriaceae; G_Bifidobacterium; S_adolescentis | 0.447  | (-0.06, 0.96) | 0.397  | (-0.18, 0.98) | 0.899 | 0.935 |
| P_Firmicutes; C_Clostridia; O_Clostridiales;<br>F_Lachnospiraceae; G_Unclassified; S_unclassified                   | -0.052 | (-0.25, 0.14) | -0.070 | (-0.29, 0.15) | 0.902 | 0.935 |
| P_Firmicutes; C_Clostridia; O_Clostridiales;<br>F_Lachnospiraceae; G_Dorea; S_formicigenerans                       | 0.161  | (-0.15, 0.47) | 0.169  | (-0.17, 0.51) | 0.973 | 0.991 |
| P_Bacteroidetes; C_Bacteroidia; O_Bacteroidales;<br>F_Odoribacteraceae; G_Odoribacter; S_unclassified               | 0.130  | (-0.3, 0.56)  | 0.127  | (-0.36, 0.61) | 0.992 | 0.992 |

<sup>a</sup> Mean change values, 95% confidence intervals, and p-values were calculated as the least squares means from linear regression models adjusted for baseline values. Bold values indicate a raw p-value that was statistically significant ( $p < 0.05$ ) or borderline significant ( $p < 0.10$ ).

<sup>b</sup> q-values were calculated using the Benjamini-Hochberg method

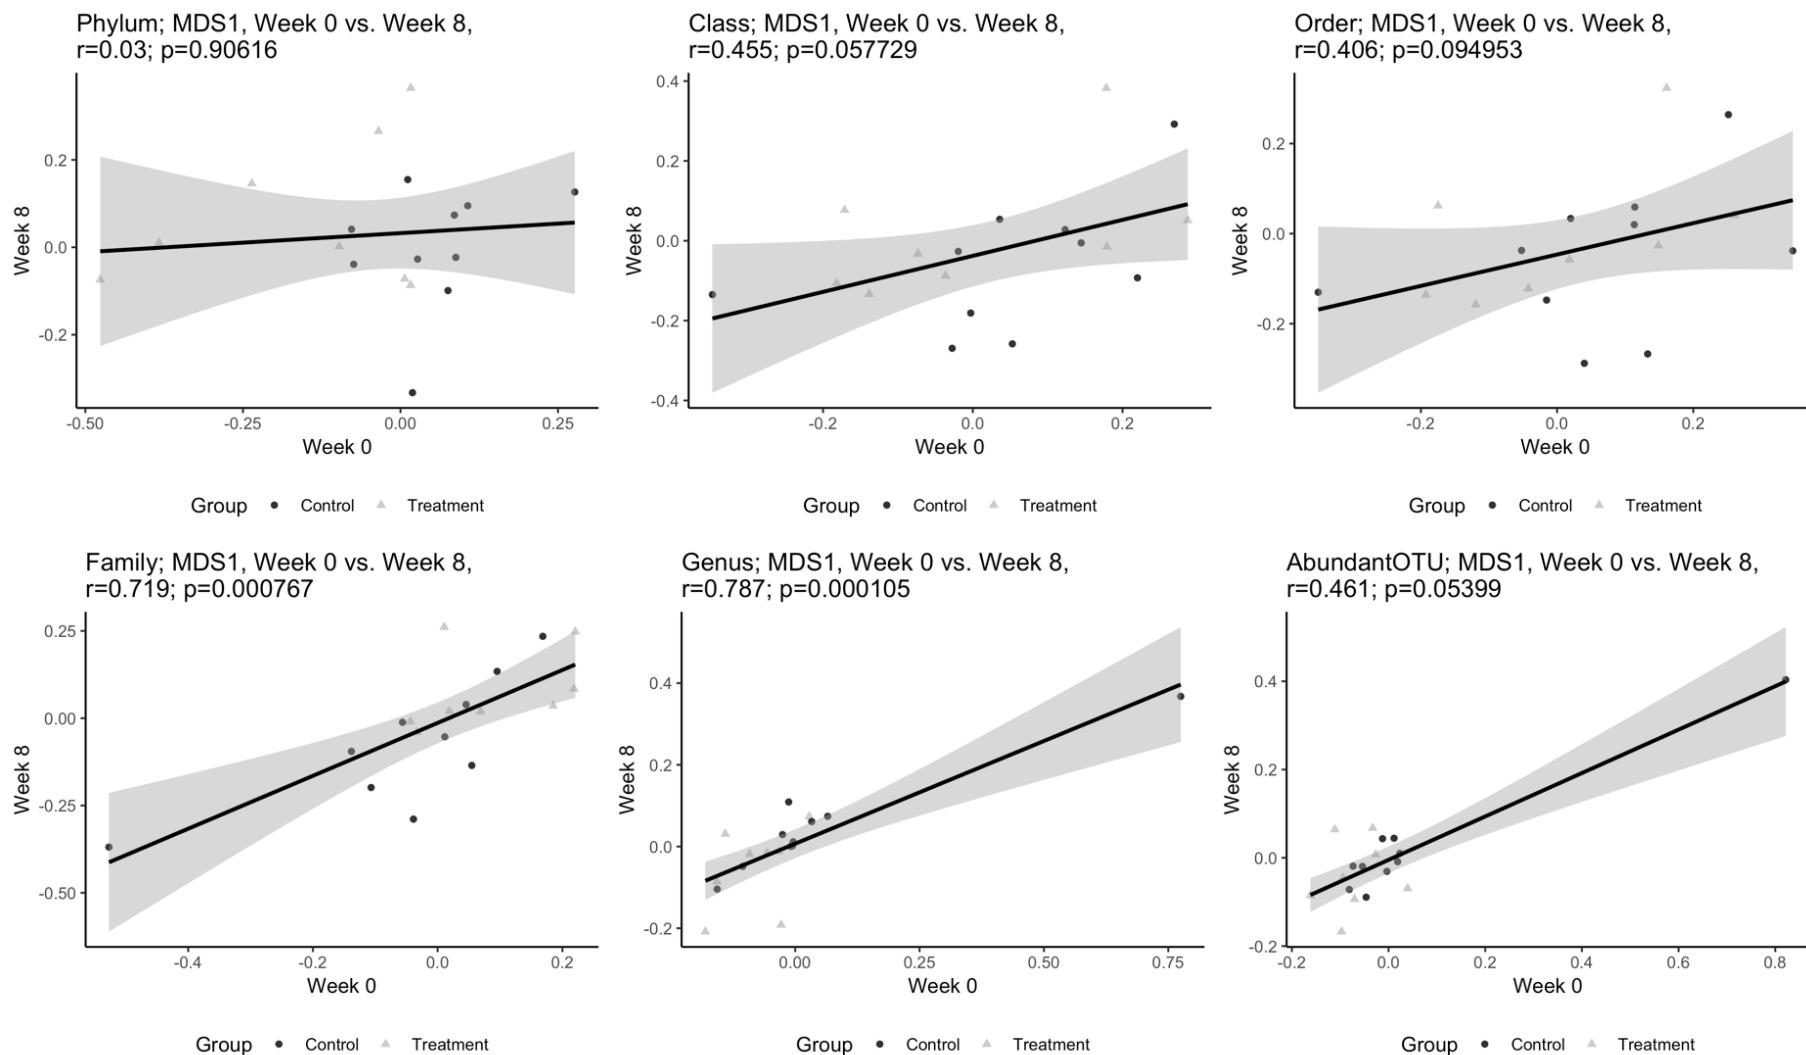

**Figure S1:** Correlations between baseline (week 0, x-axis) and week 8 (y-axis) for the first multidimensional scaling axis (MDS) in PCoA analysis at each taxa level. Black line indicates the estimated linear trend based on a linear regression model (method="lm"). P-values and correlation coefficients ( $r$ ) were calculated by Spearman correlation. Ordination was based on Bray-Curtis dissimilarity.

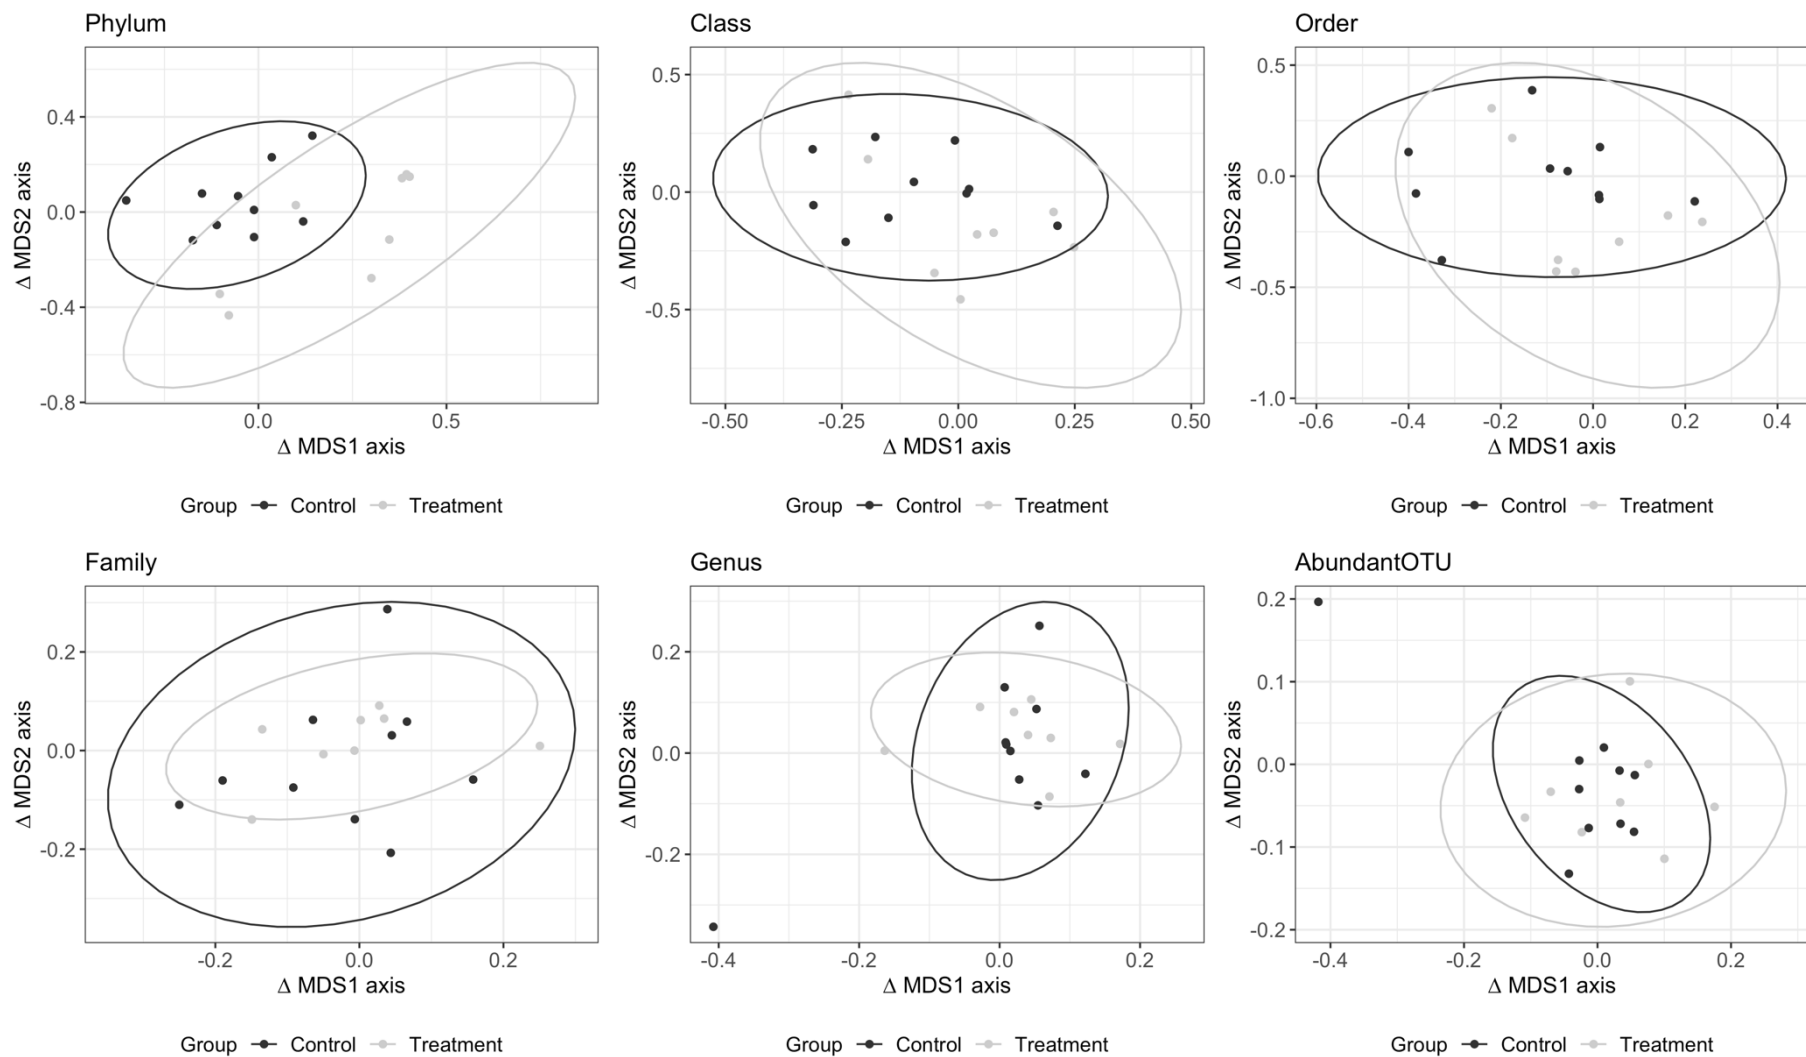

**Figure S2:** Multidimensional scaling (MDS) ordination at each taxonomic level. Ordination based on Bray-Curtis dissimilarity. Plots show that there were no significant differences in change values for the first and second MDS axes between groups (Table S4).
